# Supplementary material for: Effects of Acute Cold Stress after Intermittent Cold Stimulation on Immune-Related Molecules, Intestinal Barrier Genes, and Heat Shock Proteins in Broiler Ileum
Source: MDPI journal article supplement (doi:10.3390/ani12233260), 2022-11-23
Supplement: s1 [file s1]

Table S1. Primer sequences used for the study

|                | Reference sequence | Primer sequence(5'-3')                                   |
|----------------|--------------------|----------------------------------------------------------|
| $\beta$ -actin | NM_205518.1        | F: CACCACAGCCGAGAGAGAAAT<br>R: TGACCATCAGGGAGTTCATAGC    |
| IgA            | NM_205287.1        | F: TGCTAGTGGTTGTGGTGCTTGTG<br>R: CGGAGGCGGAGGAGACGATG    |
| IgG            | XM_025146241.1     | F: CGATTCCAGCCTCAGCGTCAC<br>R: TAGGTGCCGTTGAAGTGTCTTGG   |
| IFN- $\gamma$  | NM_205149.1        | F: GAACTGGACAGGGAGAAATGAGA<br>R: ACGCCATCAGGAAGGTTGTT    |
| IL-2           | NM_204153.1        | F: CTGTATTTCCGTAGCAATG<br>R: ACTCCTGGGTCTCAGTTG          |
| IL-6           | NM_204628.1        | F: AAATCCCTCCTCGCCAATCT<br>R: CCCTCACGGTCTTCTCCATAAA     |
| IL-8           | NM_205018.1        | F: GGCTTGCTAGGGGAAATGA<br>R: AGCTGACTCTGACTAGGAAACTGT    |
| IL-17          | NM_204460.1        | F: GCCATTCCAGGTGCGTGAACTC<br>R: CGGCGGAGGACGAGGATCTC     |
| TLR2           | XM_001232192       | F: GATTGTGGACAACATCATTGACTC<br>R: AGAGCTGCTTTCAAGTTTTCCC |
| TLR4           | NM_001030693.1     | F: AGTCTGAAATTGCTGAGCTCAAAT<br>R: GCGACGTTAAGCCATGGAAG   |
| TLR5           | NM_001024586       | F: CCTTGTGCTTTGAGGAACGAGA<br>R: CACCCATCTTTGAGAAACTGCC   |
| TLR7           | NM_001011688       | F: TTCTGGCCACAGATGTGACC<br>R: CCTTCAACTTGGCAGTGCAG       |
| TLR21          | NM_001030558       | F: TGCCCCTCCCCTGCTGTCCACT<br>R: AAAGGTGCCTTGACATCCT      |
| Claudin-1      | NM_001013611.2     | F: TGGAGGATGACCAGGTGAAGA<br>R: CGAGCCACTCTGTTGCCATA      |
| E-cadherin     | NM_001039258.2     | F: GACAGGGACATGAGGCAGAA<br>R: GCCGTGACAATGCCATTCTC       |
| Occludin       | NM_205128.1        | F: TCATCGCCTCCATCGTCTAC<br>R: TCTTACTGCGCGTCTTCTGG       |
| ZO-1           | XM_413773.4        | F: TGTAGCCACAGCAAGAGGTG<br>R: CTGGAATGGCTCCTTGTGGT       |
| ZO-2           | XM_025144669.1     | F: CGGCAGCTATCAGACCACTC<br>R: CACAGACCAGCAAGCCTACAG      |
| Mucin2         | XM_421035          | F: CAGCACCAACTTCTCAGTTC<br>R: TCTGCAGCCACACATTCTTT       |
| HSP40          | NM_001199325.1     | F: GGGCATTCAACAGCATAGA<br>R: TTCACATCCCCAAGTTTAGG        |
| HSP60          | NM_001012916.2     | F: AGCCAAAGGGCAGAAATG                                    |

|       |                |                                                                             |
|-------|----------------|-----------------------------------------------------------------------------|
| HSP70 | NM_001006685.1 | R: TACAGCAACAACCTGAAGACC<br>F: CGGGCAAGTTTGACCTAA                           |
| HSP90 | NM_001109785.1 | R: TTGGCTCCCACCCTATCTCT<br>F: TCCTGTCCTGGCTTTAGTTT<br>R: AGGTGGCATCTCCTCGGT |

---

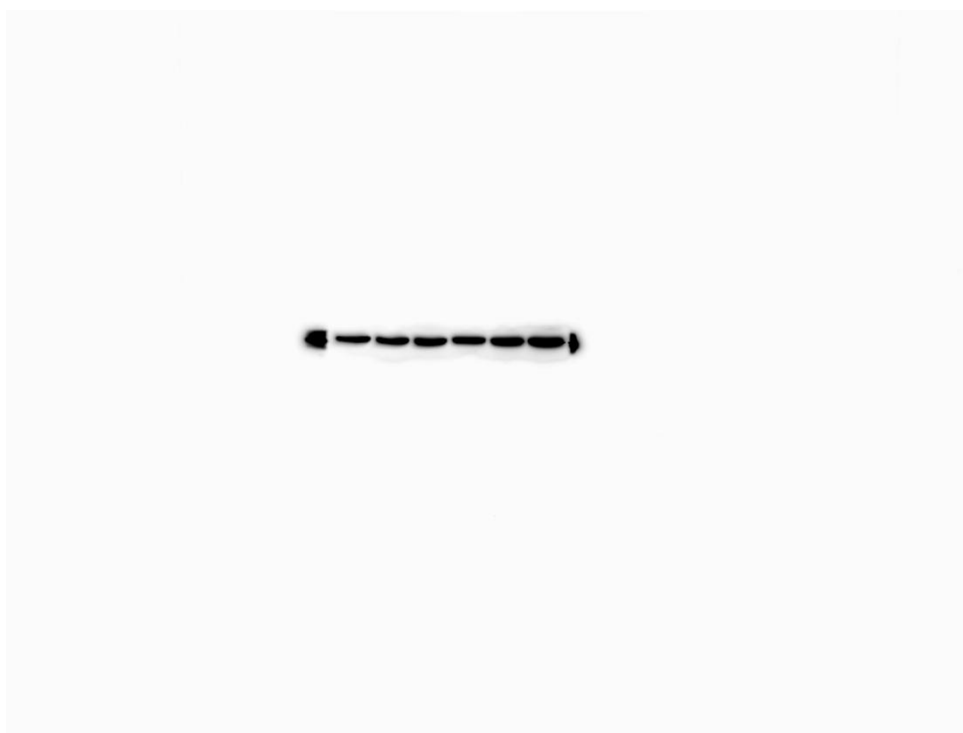

Figure S1. The original protein image of HSP40. The lanes from left to right represent: G1 (pre-ACS), G2 (pre-ACS), G3 (pre-ACS), G1 (ACS), G2 (ACS), G3 (ACS).

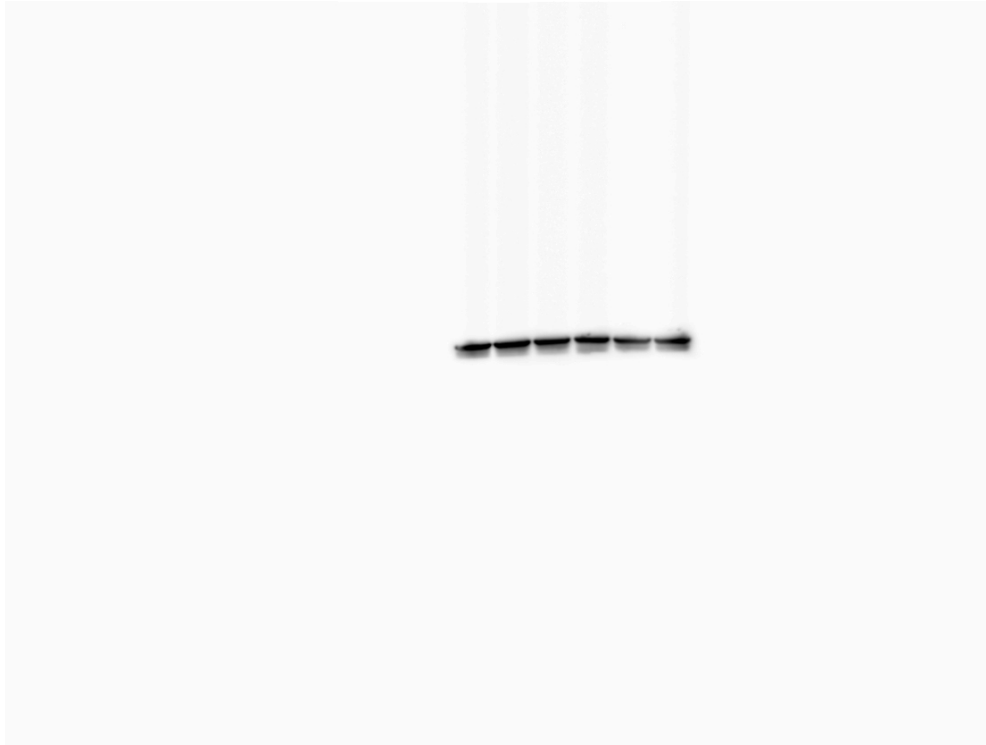

Figure S2. The original protein image of HSP60. The lanes from left to right represent: G1 (pre-ACS), G2 (pre-ACS), G3 (pre-ACS), G1 (ACS), G2 (ACS), G3 (ACS).

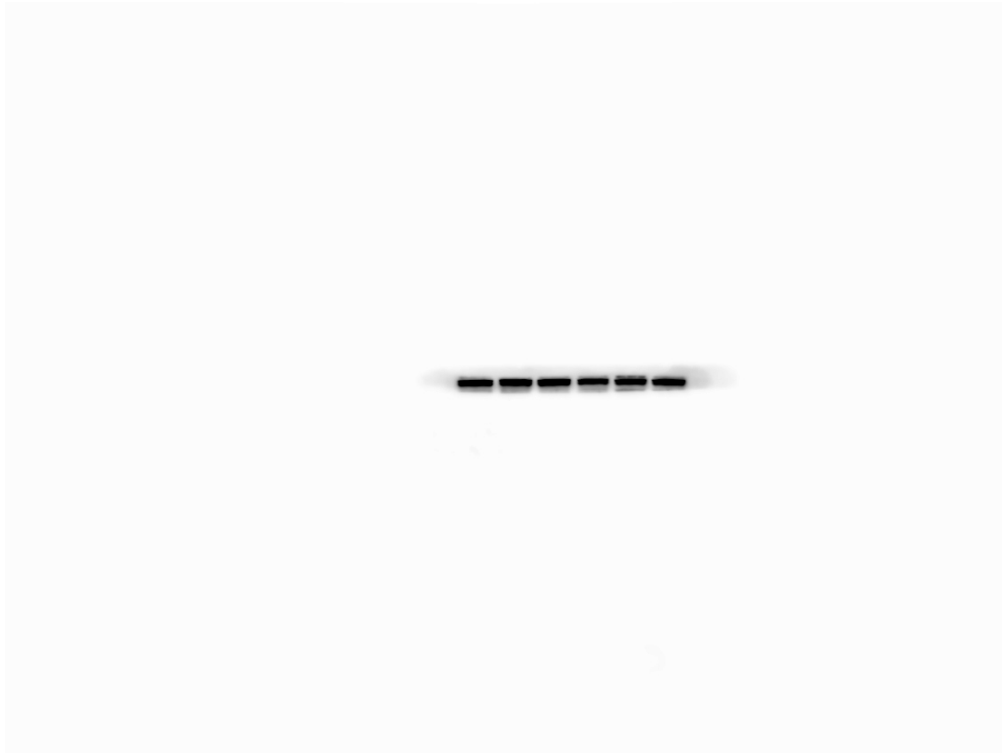

Figure S3. The original protein image of HSP70. The lanes from left to right represent: G1 (pre-ACS), G2 (pre-ACS), G3 (pre-ACS), G1 (ACS), G2 (ACS), G3 (ACS).

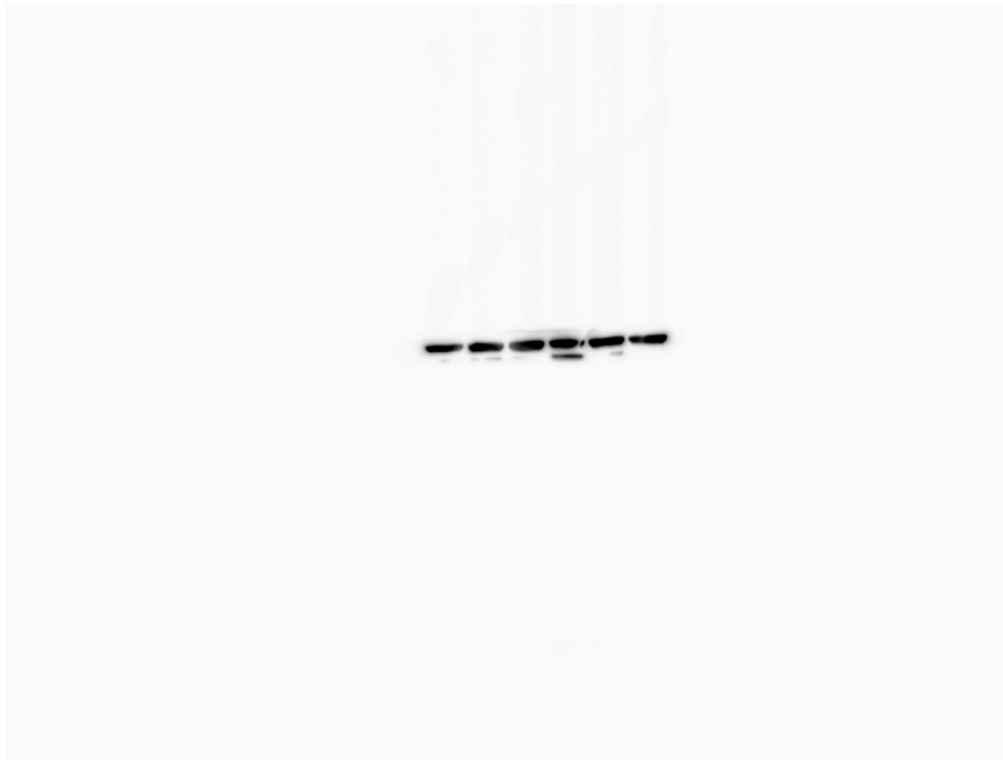

Figure S4. The original protein image of  $\beta$ -actin. The lanes from left to right represent: G1 (pre-ACS), G2 (pre-ACS), G3 (pre-ACS), G1 (ACS), G2 (ACS), G3 (ACS).
